# Supplementary material
Source: Springer Nature journal article supplement (https://www.springermedizin.de/resource/supplementary/12911_2005_103_MOESM14_ESM.pdf/9527132)

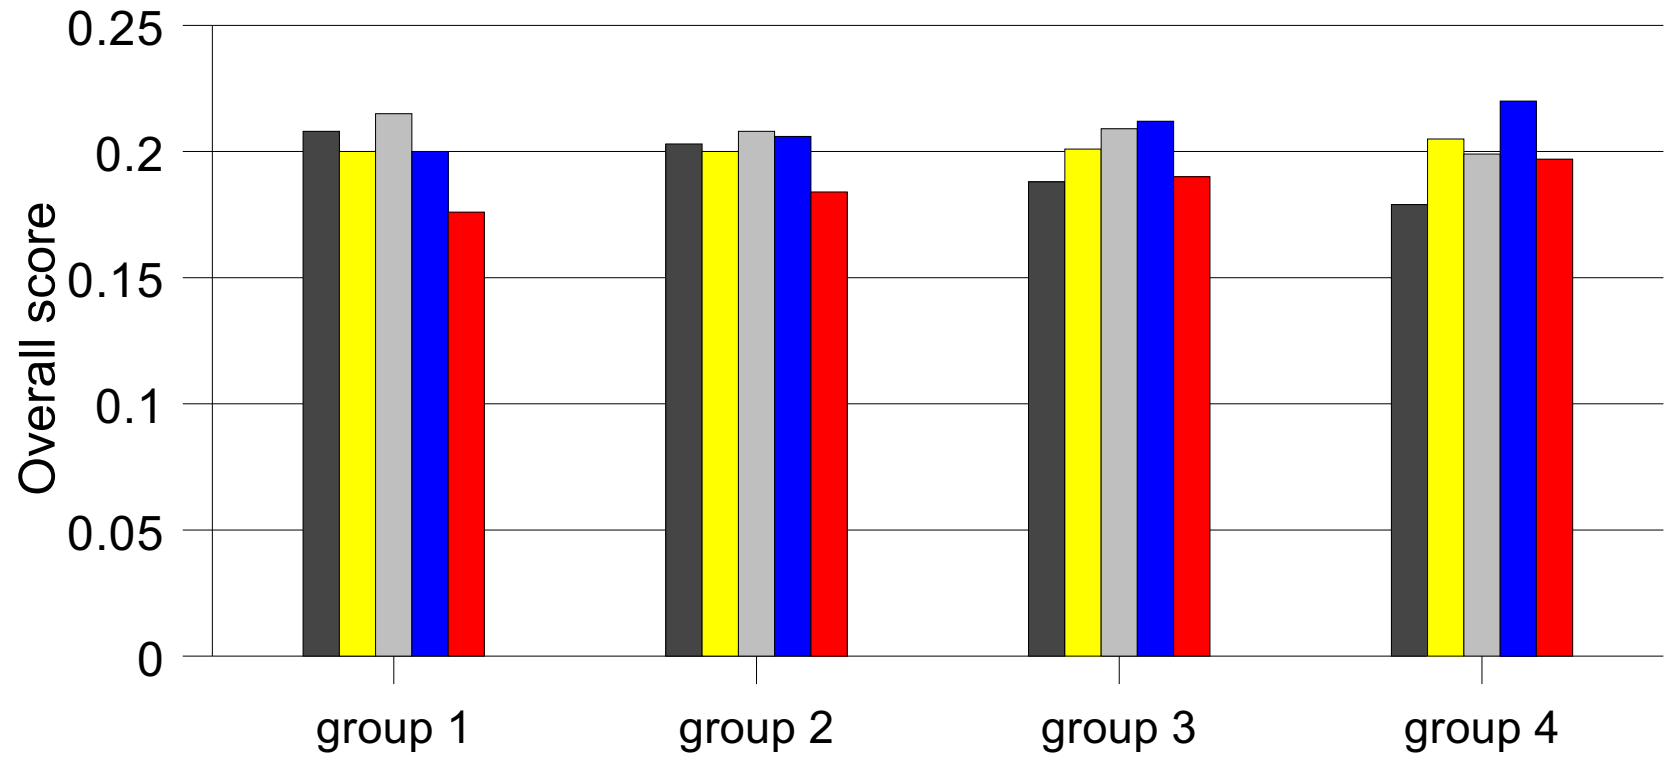

-  No test, no treat
-  Culture
-  Treat all
-  Rapid strep
-  Rapid strep & culture

Supplement: MOESM14 [file 9527132]
